# Supplementary material for: Composition processing property relationship of vitrimers Based on polyethyleneimine
Source: Royal Society of Chemistry journal article supplement (doi:10.1039/d1py00116g), 2021-01-01
Supplement: d1py00116g1.pdf [file d1py00116g1.pdf]

# Composition Processing Properties Relationship of Vitrimers Based on Polyethyleneimine

Natanel Jarach<sup>1</sup>, Daniel Golani<sup>1</sup>, Ofer Asaf<sup>1</sup>, Samuel Kenig<sup>1</sup>, Hanna Dodiuk<sup>1</sup>, Yoav Shamir<sup>2</sup>, Amir Goldbourt<sup>2</sup>,  
Naum Naveh<sup>1\*</sup>

<sup>1</sup>The Department of Polymer Materials Engineering, Pernick Faculty of Engineering, Shenkar – Engineering.  
Design. Art. Raman-Gan, Israel.

<sup>2</sup>School of Chemistry, Tel Aviv University, Tel Aviv, Israel.

\*Corresponding Author

**Table S 1.** Gel content,  $\overline{M}_c$  and reacted secondary amine groups in PI samples.

| Sample | Gel content [%] | $\overline{M}_c \left[ \frac{gr}{mol} \right]$ | Reacted secondary amine groups [%] |
|--------|-----------------|------------------------------------------------|------------------------------------|
| PI     | 99.4±0.1        | 240±9                                          | 88.0±3.8                           |
| PI-10  | 99.0±0.4        | 222±2                                          | 90.2±0.9                           |
| PI-20  | 99.6±0.1        | 208±7                                          | 97.1±3.7                           |
| PI-40  | 99.5±0.1        | 204±7                                          | 98.5±1.3                           |
| PI-60  | 99.6±0.3        | 200±1                                          | 98.7±0.3                           |
| PI-M   | 98.4±0.7        | 219±24                                         | 89.7±10.2                          |

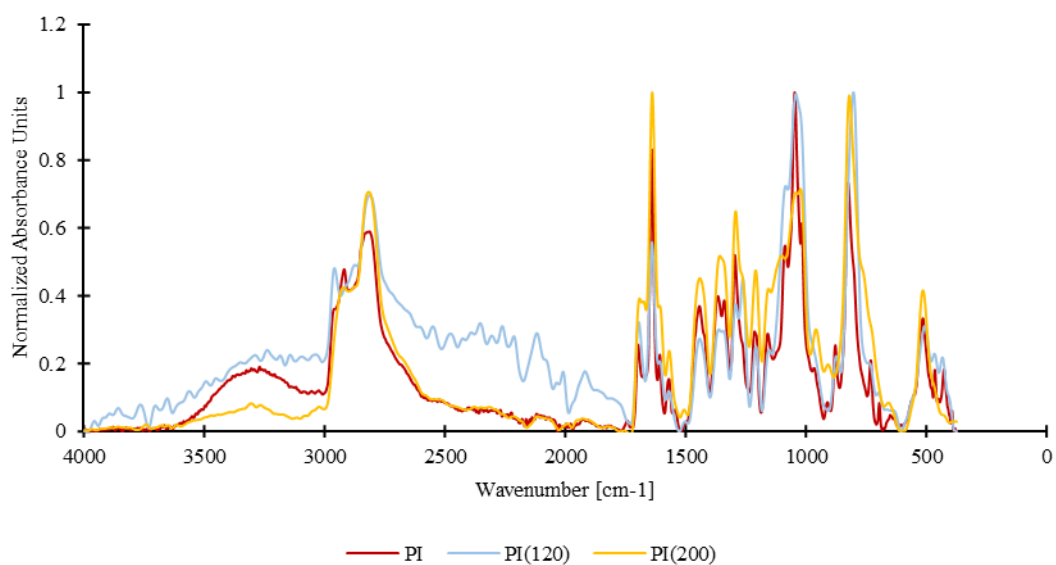

**Figure S 1.** ATR-IR of PI, PI-120 and PI-200 polyimine samples after drying.

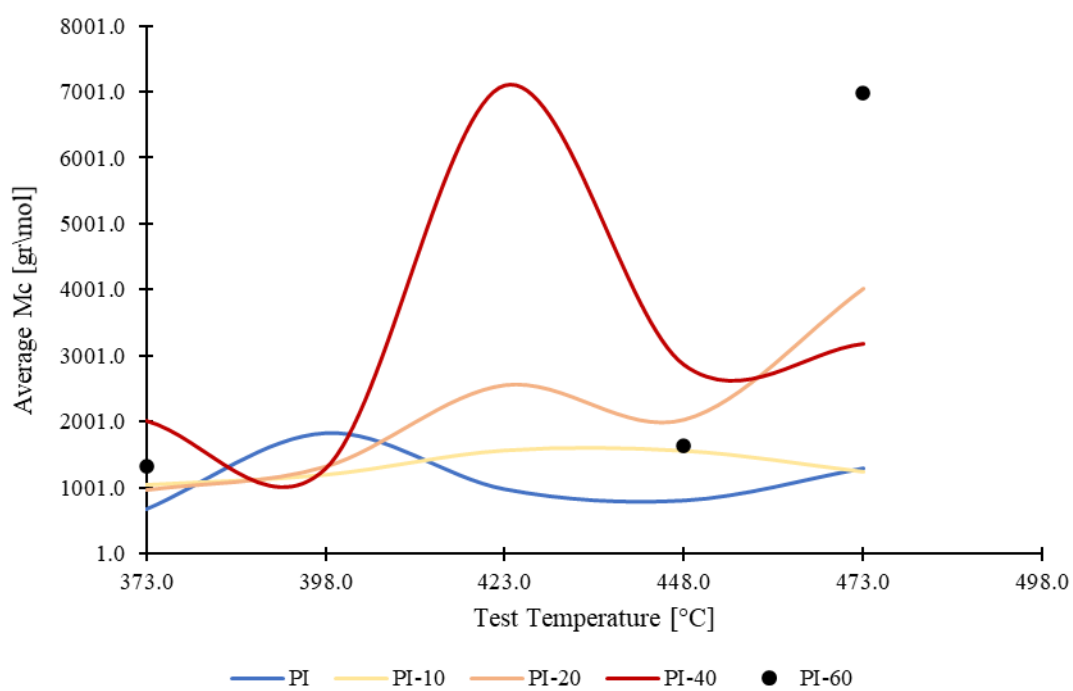

**Figure S 2.** Cross-linking density of PI, PI-10, PI-20, PI-40 and PI-60 at temperatures based on the rubber elasticity theory.

A)

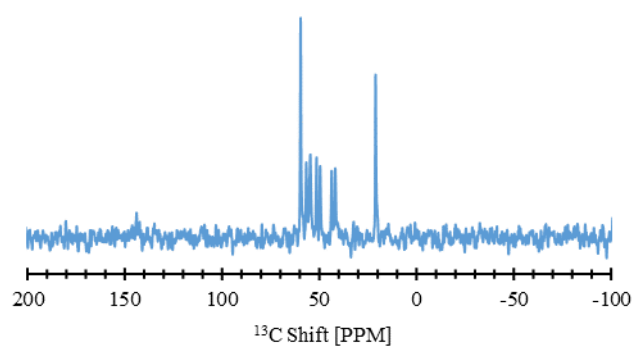

**B)**

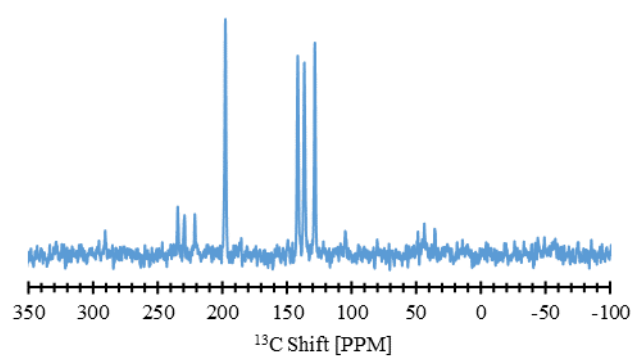

**Figure S 3.**  $^{13}\text{C}$  SS-NMR of PEI (A) and TPA (B) acquired on a 14.1T magnet. PEI spectrum was acquired with a single pulse excitation and low power  $^1\text{H}$  decoupling using 32 scans and a recycle delay of 13 sec. TPA spectrum was acquired using the CPMAS experiment employing 32 scans and a recycle delay of 20 sec

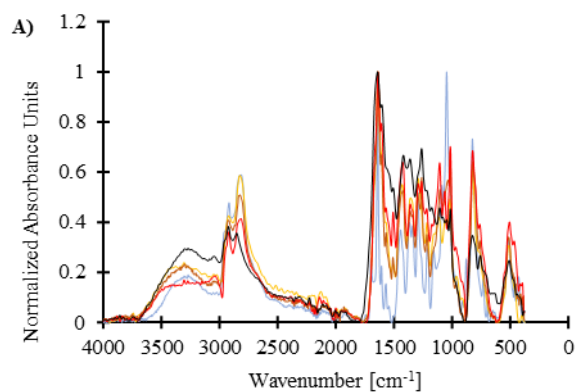

— PI — PI-10 — PI-20 — PI-30 — PI-120

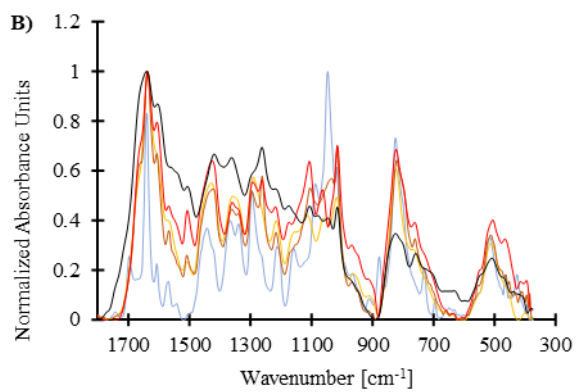

— PI — PI-10 — PI-20 — PI-30 — PI-120

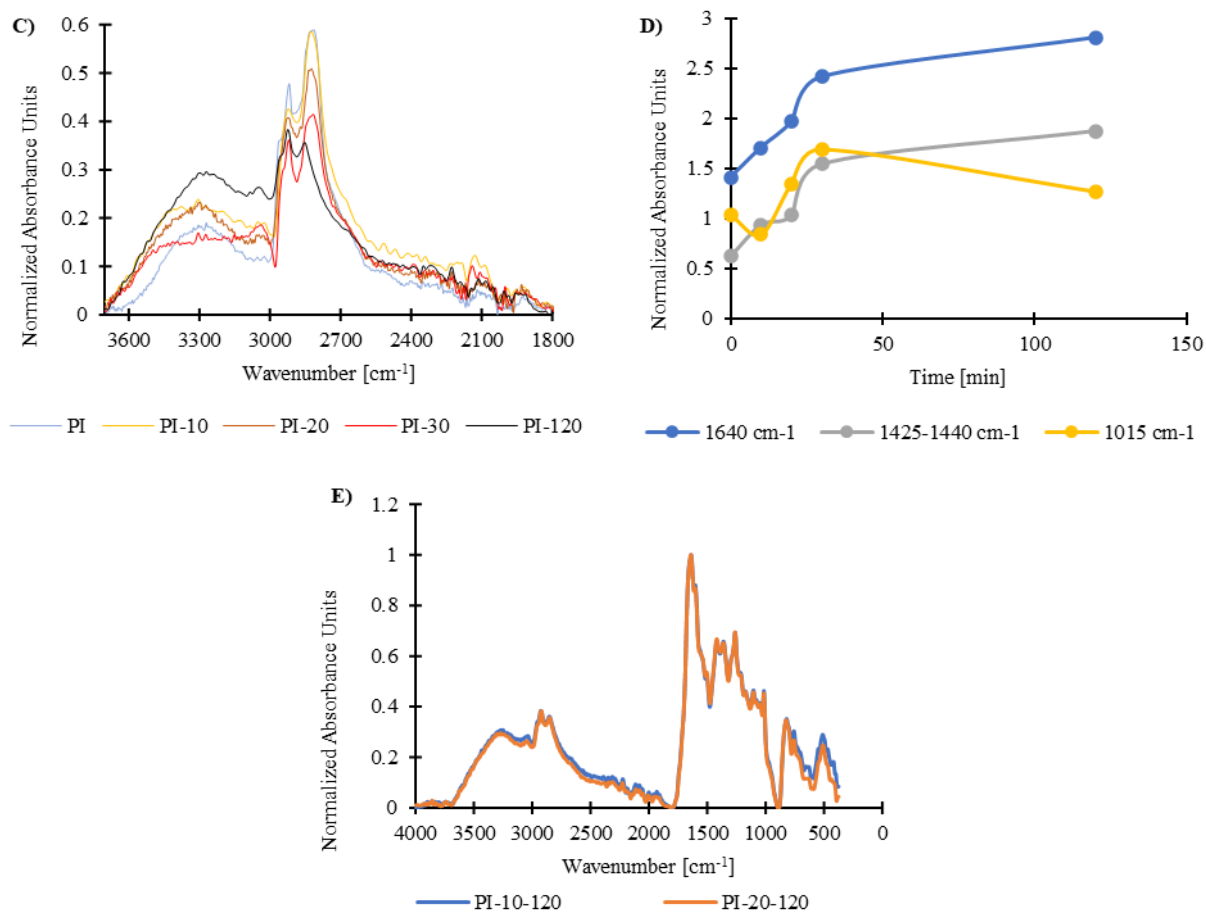

**Figure S 4.** A – a full range ATR-IR spectra for PI, PI-10, PI-20, PI-30 and PI-120, B – 300-1800  $\text{cm}^{-1}$  ATR-IR spectra for these samples, C – 1800-3700  $\text{cm}^{-1}$  ATR-IR spectra for these samples, D – changing in absorbance for chosen signals (normalized to  $\text{CH}_2$  spectra) during time at 220°C, E – ATR-IR spectra for PI-10P and PI-20P.

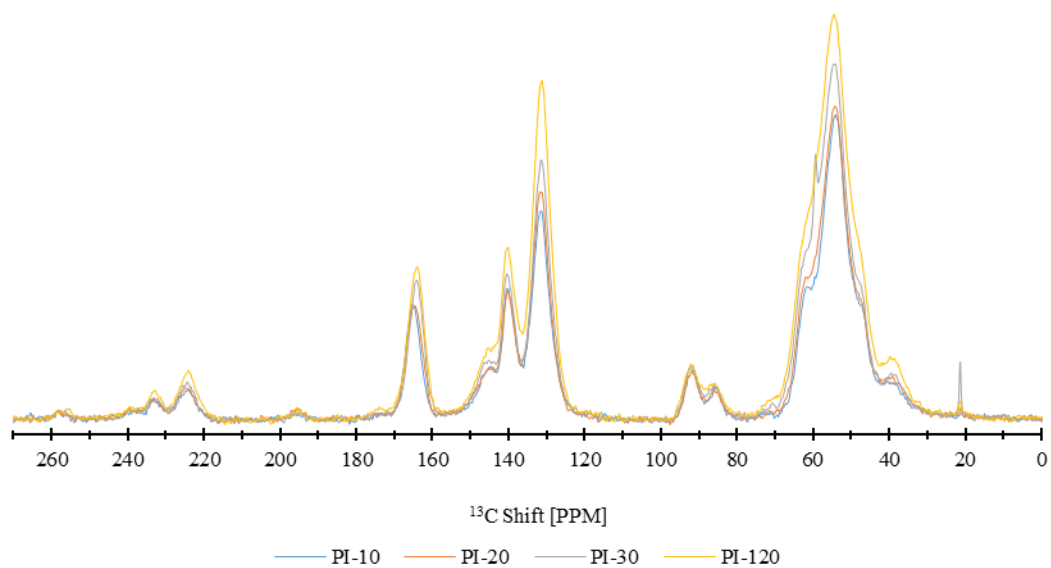

**Figure S 5.** <sup>13</sup>C-CPMAS SS-NMR of PI samples molded at 150°C for 10, 20, 30, and 120 min. All spectra were acquired on a 14.1T magnet using 3000 scans, recycle delays of 4.3-7.7 sec, a CP contact time of 2 ms with 50 kHz <sup>13</sup>C power level and 73 kHz <sup>1</sup>H power level, and using 80 kHz <sup>1</sup>H swf-tppm decoupling.

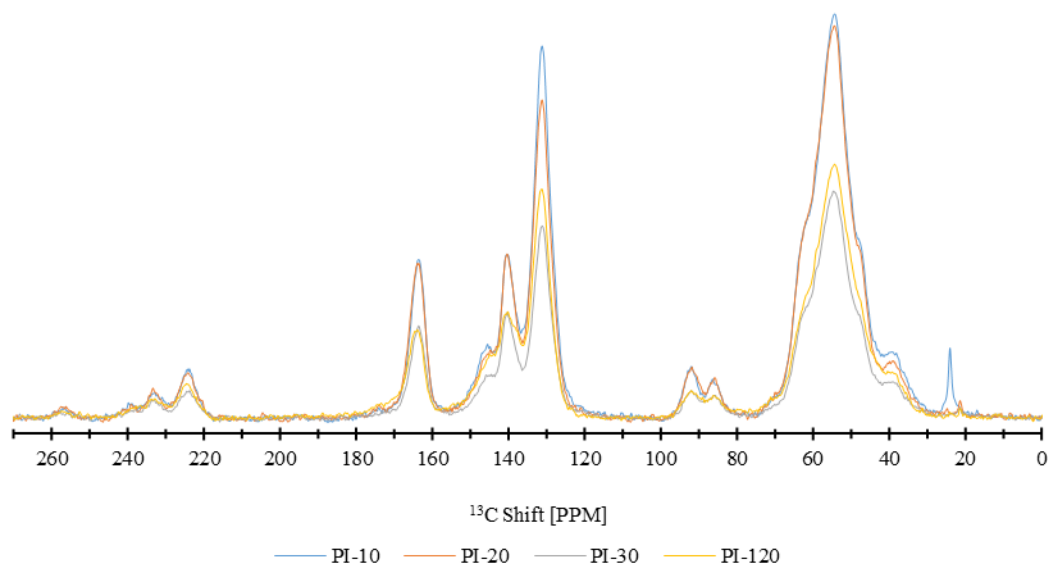

**Figure S 6.** <sup>13</sup>C-CPMAS SS-NMR of PI samples molded at 180°C for 10, 20, 30, and 120 min. All spectra were acquired on a 14.1T magnet using 1600 (PI-30) or 3000 scans and recycle delays of 7-14 sec. Other parameters are similar to Figure S5.

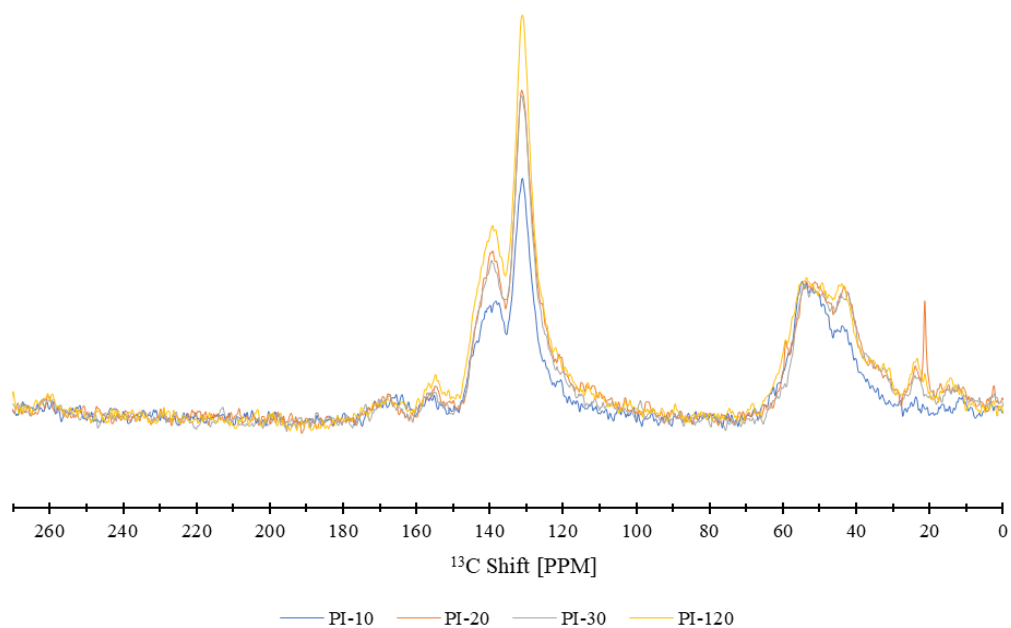

**Figure S 7.**  $^{13}\text{C}$ -multi-CP MAS SS-NMR of PI samples molded at 260°C for 10, 20, 30, and 120 min. All spectra were acquired on a 9.4T magnet using 5500 scans, recycle delays of 3-4 sec, a CP contact time of 2 ms with 50 kHz  $^{13}\text{C}$  power level and 86 kHz  $^1\text{H}$  power level, 11 CP repetitions with a repolarization time of 0.2 sec, and using 100 kHz  $^1\text{H}$  swf-tpm decoupling.

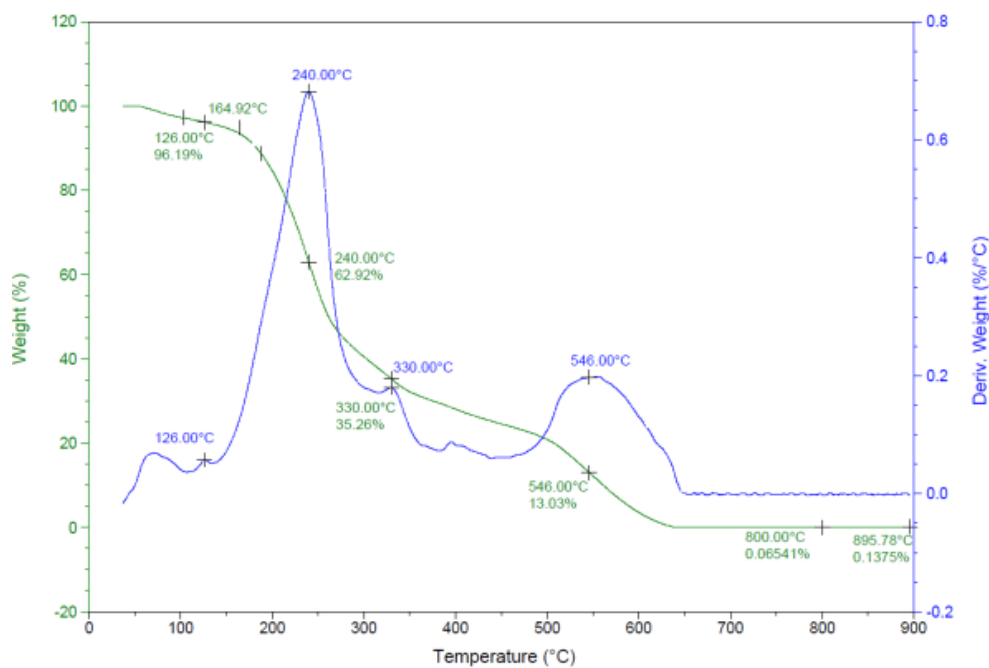

**Figure S 8.** TGA results of PEI.

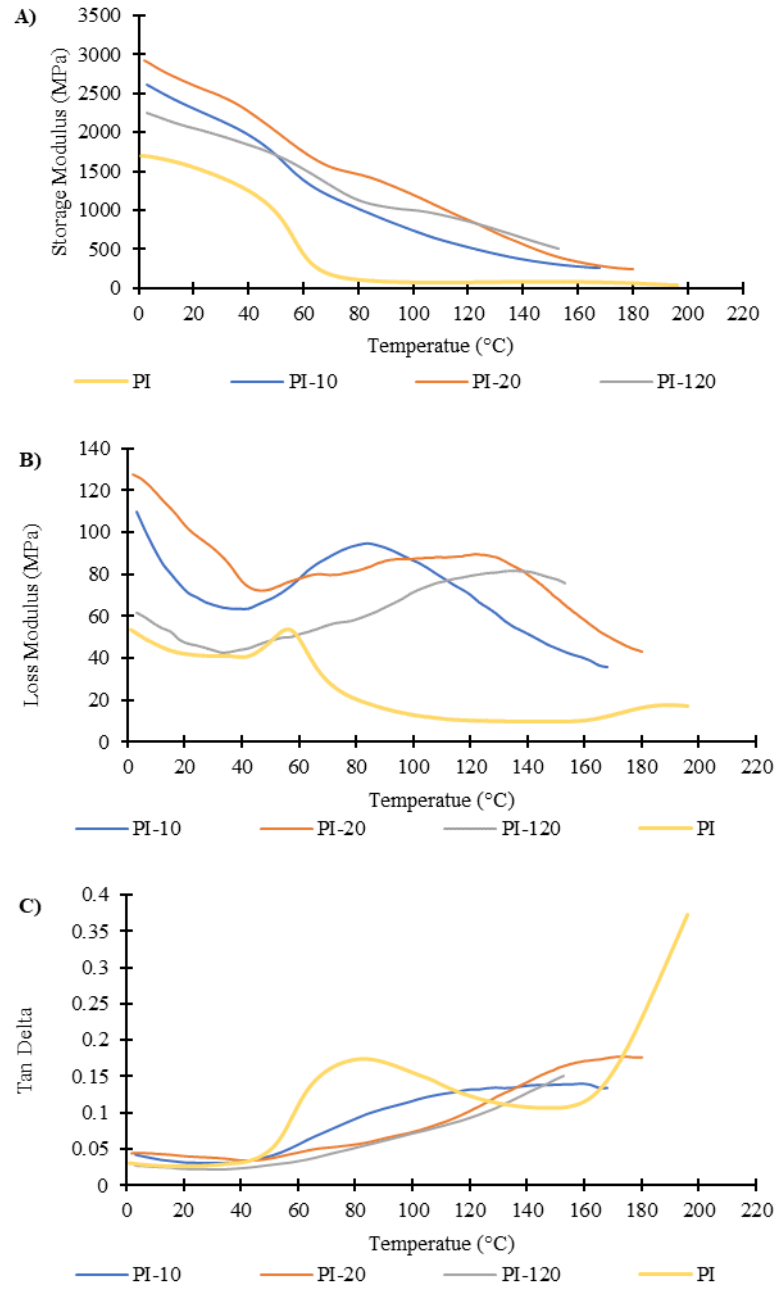

**Figure S 9.** Dynamic flexural results (DMA) – storage modulus (A), loss modulus (B) and tan delta (C).
